# Supplementary material
Source: PubMed Central journal article supplement (PMC3295299)
Supplement: 1115728109_pnas.1115728109_SI.pdf [file 1115728109_pnas.1115728109_SI.pdf]

# Supporting Information

Kohzuma et al. 10.1073/pnas.1115728109

## SI Materials and Methods.

### Construction of Gamma Exchange-Revised ATP Synthase (*Gamera*).

The null mutant for *ATPC1* (*dpa1*) was as described in (1). The full-length coding sequence of the intronless *ATPC2* gene was amplified by *Pyrococcus furiosus* (Pfu) polymerase from wild-type genomic DNA using the forward primer 5'-AACAAAAAATG-ACAGGTTTCGATCTCG-3' and the reverse primer 5'-CACAG-CTGTAGTTTCTACCTAAGACTCTCG-3' that inserts an XbaI restriction site at the 3' end of the gene. The PCR fragment was cloned in the binary vector pSEX001-VS under control of the cauliflower mosaic virus 35S promoter. Successful cloning was verified by sequencing. The construct was introduced into plants heterozygous for *dpa1* mutation via *Agrobacterium*-mediated transformation (2) and the segregating transformant progenies were selected on rock wool (Grodan, Hobro) immersed in 10 mg/L sulfadiazine (3).

**Construction of *ATPC1*- and *ATPC2*- $\beta$ -Glucuronidase (GUS) Lines.** Promoter regions of *ATPC1* and *ATPC2* genes were amplified from *Arabidopsis* cv. Columbia genomic DNA with the primer pairs:

5'-GGGGACAAGTTTGTACAAAAAAGCAGGCTYYTTT-CGTTCTAATTTCTAACCAAAATATT-3', 5'-GGGGACCAC-TTGTACAAGAAAGCTGGGTYTGTGTTTGTTCAGAC-AGTGT-3' for *ATPC1* and 5'-GGGGACAAGTTTGTAC-AAAAAAGCAGGCTYYAAGACGGCGCGCATTTTGTAGA-GC-3', 5'-GGGGACCACTTTGTACAAGAAAGCTGGGTYT-TTGGGAAAGAAGACCCTGA-3' for *ATPC2*. The corresponding PCR products were first cloned in pDONOR207 vector (Invitrogen) and then transferred to the binary vector pKGWFS7,0 (4) to drive the expression of GUS gene. The constructs were in-

troduced into *Arabidopsis* cv. Columbia plants via *Agrobacterium*-mediated transformation (2) and the transformant plants were selected on rock wool (Grodan, Hobro) immersed in 25 mg/L kanamycin (3).

**Localization of the  $\gamma_2$  Protein.** The first 297 nucleotides of *ATPC2* encoding a putative transit peptide were fused to the sequence of enhanced green fluorescence protein (eGFP) by overlap extension PCR using the primers:

5'-CACCATGACAGGTTTCGATCTCGACC-3', 5'-TGCTCA-CCATTATGACTGCATCTTGAG-3', 5'-TGCAGTCATAAGG-TGAGCAAGGGCGAGGAGC-3' 5'-AGTACACAGTCCTTG-TACAGCTCGTCCA-3'. The PCR fragment was first cloned into pENTR/TOPO vector (Invitrogen) and then transferred to p2GW7,0 containing the 35S promoter and terminator (4). *Arabidopsis* protoplasts were isolated from 7 d old seedlings according to (5) and polyethylene glycol mediated transient transformation was performed according to (6)

**Phylogenetic Tree Reconstruction.** Neighbor-joining trees were reconstructed using ClustalX (7) and Molecular Evolutionary Genetics Analysis 4 (8) These two methods yielded tree topologies differing only in a few very late branching orders. The tree shown in Fig. S5 has been obtained using Clustal X. Gap positions were taken into account. Multiple substitutions were allowed for using Kimura's correction algorithm (7, 9). Calculated bootstrap values correspond to the frequency of occurrence of nodes in 1,000 bootstrap replicates. All sequences were retrieved from the plant genome database (PlantGDB) <http://www.plantgdb.org>.

1. Bosco CD, et al. (2004) Inactivation of the chloroplast ATP synthase gamma subunit results in high non-photochemical fluorescence quenching and altered nuclear gene expression in *Arabidopsis thaliana*. *J Biol Chem* 279:1060-1069.
2. Clough SJ, Bent AF (1998) Floral dip: A simplified method for *Agrobacterium*-mediated transformation of adult *Arabidopsis thaliana* plants by vacuum infiltration. *Plant J* 16:735-743.
3. Hadi MZ, Kemper E, Wendeler E, Reiss B (2002) Simple and versatile selection of *Arabidopsis* transformants. *Plant Cell Rep* 21:130-135.
4. Karimi M, Inzé D, Depicker A (2002) Gateway vectors for *Agrobacterium*-mediated plant transformation. *Trends Plant Sci* 7:193-195.
5. Dovzhenko A, Dal Bosco C, Meurer J, Koop HU (2003) Efficient regeneration from cotyledon protoplasts in *Arabidopsis thaliana*. *Protoplasma* 222:107-111.
6. Koop HU, et al. (1996) Integration of foreign sequences into the tobacco plastome via polyethylene glycol-mediated protoplast transformation. *Planta* 199:193-201.
7. Thompson JD, Gibson TJ, Plewniak F, Jeanmougin F, Higgins DG (1997) The CLUSTAL\_X windows interface: flexible strategies for multiple sequence alignment aided by quality analysis tools. *Nucleic Acids Res* 25:4876-4882.
8. Tamura K, Dudley J, Nei M, Kumar S (2007) MEGA4: Molecular Evolutionary Genetics Analysis (MEGA) software version 4.0. *Mol Biol Evol* 24:1596-1599.
9. Galtier N, Gouy M, Gautier C (1996) SEAVIEW and PHYLO\_WIN: Two graphic tools for sequence alignment and molecular phylogeny. *Comput Appl Biosci* 12:543-548.
10. Ariizumi T, Lawrence PK, and Steber CM (2011) The role of two F-box proteins, SLEEPY1 and SNEEZY, in *Arabidopsis* gibberellin signaling. *Plant Physiol* 155: 765-775.

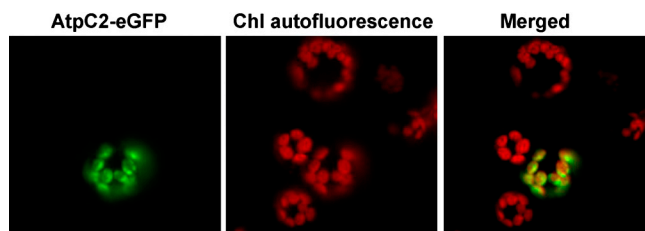

Fig. S1. *ATPC2*-eGFP localization in transiently transformed *Arabidopsis* protoplasts. Images were recorded 24 h after protoplast transformation using Axiovert 200 M inverted microscope and 20xW NA1.3 lenses (Carl Zeiss).



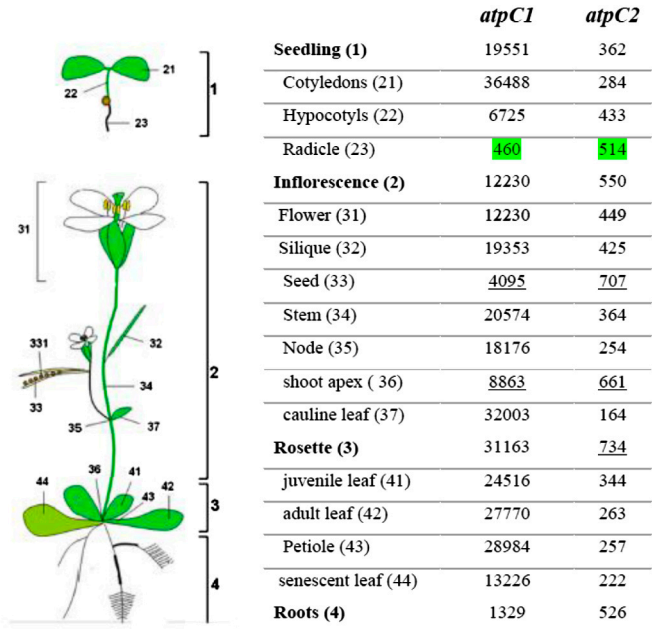

Fig. S4. Expression profiles of *ATPC1* and *ATPC2* genes using the Genevestigator gene atlas.

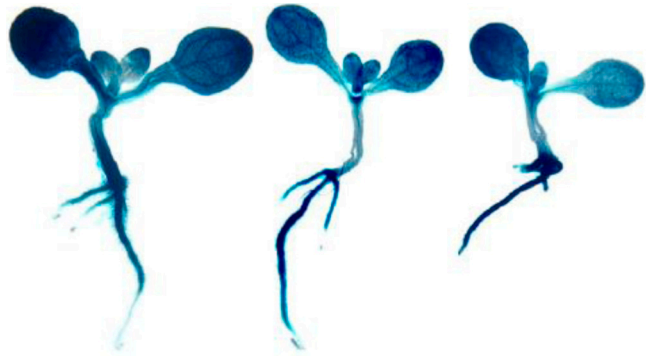

Fig. S5. *ATPC1::GUS* staining in 10 d old seedlings.

|                                  |    |                                               |
|----------------------------------|----|-----------------------------------------------|
| <i>Arabidopsis thaliana</i>      | 1; | TLLPLSPKGEICDINGTCVDAAEDEFFRLTTKEGKLTVERETFR  |
| <i>Arabidopsis thaliana</i>      | 2; | TLLPLSMKGESCDVKGECVDAIEDEMFRLTSKDGKLAVERTKLE  |
| <i>Arabidopsis lyrata</i>        | 1; | TLLPLSPKGEICDINGTCVDAAEDELFRLLTTKEGKLTVERETFR |
| <i>Arabidopsis lyrata</i>        | 2; | TLLPFSMKGESCDVKGECVDAEDEMFRLLTSKDGKLAVERTKLE  |
| <i>Glycine max</i>               | 1; | TLLPLSPKGEICDINGVCVDAAEDEFFRLTTKEGKLTVERDVVR  |
| <i>Glycine max</i>               | 2; | TLLPLSPKGEICDVNGVCVDAAEDEFFRLTTKEGKLTVERDVVR  |
| <i>Ricinus communis</i>          | 1; | TLLPLSPEGEICDINGNCVDAAEDEFFRLTTKEGKLTVERDVVR  |
| <i>Ricinus communis</i>          | 2; | TLLPLSPRGGVCDVNGKCVDAADDEFFRLTSKEGKLAVERESGK  |
| <i>Selaginella tamariscina</i>   | 1; | TLLPLSPQGQVCDINGNCVDAEDEMFRLLTTKDGKLTVERDTFK  |
| <i>Selaginella tamariscina</i>   | 2; | TLLPLSPQGQVCDINGNCVDAEDEMFRLLTTKDGKLTVERDTFK  |
| <i>Vitis vinifera</i>            | 1; | TLLPLSPKGEICDVNGKCVDAAEDEFFRLTTREGKLTVERDVIR  |
| <i>Vitis vinifera</i>            | 2; | TLLPLSMKGEVFDQNGNCVDAEDELFRLLTTKEGKLSVERDKVQ  |
| <i>Populus trichocarpa</i>       | 1; | TLLPLSPKGEICDVNGVCVDAAEDEFFRLTTREGKLTVERGVSR  |
| <i>Populus trichocarpa</i>       | 2; | TLLPLSPKGRICDMNGVSVADGDEFFRLTTKEGKLAVERDVVR   |
| <i>Lotus japonicus</i>           | 1; | TLLPLSPKGEICDINGNCVDAAEDELFRLLTTKEGKLTVERDTIR |
| <i>Lotus japonicus</i>           | 2; | TLLPLSRKGEVCDVNGNSVDAIDDEYFRLLTSKDGKLALERGVVQ |
| <i>Nelumbo nucifera</i>          | 1; | TLLPLSPKGEICDINGNCVDAAEDELFRLLTTKEGKLTVERDTIR |
| <i>Nelumbo nucifera</i>          | 2; | TLLPLSRKGEVCDVNGNSVDAIDDEYFRLLTSKDGKLALERGVVQ |
| <i>Nicotiana tabacum</i>         | 1; | TLLPLSPKGEICDINGNCVDAANDEFFRLTTKEGKLTVERDIIR  |
| <i>Nicotiana tabacum</i>         | 2; | TLLPLISSKGEVLDVNGKSVDVDEDEFFRLTTKEGKLIVERDHLR |
| <i>Nicotiana tabacum</i>         | 3; | TLLPLISSKGEVLDVNGKSVDVDEDEFFRLTTKEGKLIVERDHLR |
| <i>Medicago polymorpha</i>       | 1; | TLLPLSPKGEICDINGNCVDAAEDELFRLLTTKEGKLTVERDAVR |
| <i>Medicago polymorpha</i>       | 2; | TLLPLSKKGEVFDVNGNSVDVLEDEFFRLTSKDGKLALKRDVKK  |
| <i>Artemisia indica</i>          | 1; | TLLPLSPKGEICDINGVCVDAAEDEFFRLTTKEGKLTVERDVVR  |
| <i>Artemisia indica</i>          | 2; | TLLPLSSKGEIRDGNGNSVDASEDEFFRLTSKEGKLAVERDRMM  |
| <i>Malus pumila</i>              | 1; | TLLPLSPKGEICDINGVCVDAADDEFFRLTTKEGKLTVERDVIK  |
| <i>Malus pumila</i>              | 2; | TLLPLLPAGEVVDVNGNSVDATEDEFFRLTTKKGKLSMERGSVK  |
| <i>Malus pumila</i>              | 3; | TLLPLSPKGEVVDVNGNSVDAIEDEFFRLTTKEGKLSVERESVK  |
| <i>Lycopersicon esculentum</i>   | 1; | TLLPLSPKGEICDINGNCVDAAEDEFFRLTTKEGKLTVERDVMR  |
| <i>Lycopersicon esculentum</i>   | 2; | TLLPLRG-GE---E-EFF-D--EDEFFRLTSKEGKLSVVRD-LR  |
| <i>Physcomitrella patens</i>     | 1; | TLLPLSPQGEVCDISGNCVDAADDEFFRLTTKDGKFSVERETIR  |
| <i>Physcomitrella patens</i>     | 2; | TLLPLSPQGEVCDISGNCVDAADDEFFRLTTKDGKFSVERETVR  |
| <i>Physcomitrella patens</i>     | 3; | TLLPLSPAGEVCDISGNCVDAADDEFFRLTTKDGKFSVERETVR  |
| <i>Spinacia oleracea</i>         | ;  | TLLPLSPKGEICDINGKCVDAAEDELFRLLTTKEGKLTVERDMIK |
| <i>Cucumis melo</i>              | ;  | TLLPLSPKGEICDINGVCVDAAEDEFFRLTTKEGKLTVERDSVR  |
| <i>Zea mays</i>                  | ;  | TLLPMSPKGEICDVNGVCVDATEDELFRLLTTKEGKLTVEREKVK |
| <i>Oryza sativa</i>              | ;  | TLLPMSPKGEICDINGVCVDATEDELFRLLTTKEGKLTVEREKVK |
| <i>Chlamydomonas reinhardtii</i> | ;  | TLLPMTPMGELCDVDGKCVDAADDEIFKLTTKGGEFAVEREKTT  |
| <i>Osteococcus lucimarinus</i>   | ;  | TLLPLSKEGEVCNVDGVCIDAAANDEIFKLTTEGKFAVKREASD  |

Fig. S6. Alignment of amino acid sequences of chloroplast  $\gamma$  subunits using *Arabidopsis* numbering. Red amino acid residues are conserved. Blue amino acids are cysteine residues involved in redox regulation. Amino acids 199 and 205 are key regulators.
